# Supplementary material for: Agricultural lime disturbs natural strontium isotope variations: Implications for provenance and migration studies
Source: PubMed Central journal article supplement — Sci Adv. 2019 Mar 13;5(3):eaav8083. doi: 10.1126/sciadv.aav8083 (PMC6415960; doi:10.1126/sciadv.aav8083), 2019-03-13
Supplement: aav8083_SM.pdf [file aav8083_SM.pdf]

## Supplementary Materials for

### **Agricultural lime disturbs natural strontium isotope variations: Implications for provenance and migration studies**

Erik Thomsen\* and Rasmus Andreasen

\*Corresponding author. Email: erik.thomsen@geo.au.dk

Published 13 March 2019, *Sci. Adv.* **5**, eaav8083 (2019)

DOI: 10.1126/sciadv.aav8083

#### **The PDF file includes:**

Table S1. Strontium isotope and concentration data for surface water, groundwater, rainwater, and reference samples.

Table S2. Basic statistical data on strontium isotopic composition ( $^{87}\text{Sr}/^{86}\text{Sr}$ ) and strontium concentration of pristine and farmland samples.

Table S3. Strontium isotope and concentration data for agricultural lime products, fertilizers, and animal feed.

Table S4. Calculated strontium isotope composition and concentration for two farms in the Vallerbæk area.

Fig. S1. Calcium carbonate distribution in glaciogenic deposits, middle Jutland.

Fig. S2. Simplified maps and description of localities.

Fig. S3. Influence of soil thickness and soil composition on the level of disturbance of the  $^{87}\text{Sr}/^{86}\text{Sr}$  ratio from agricultural lime.

Fig. S4. Comparison of strontium concentrations measured by quadrupole ICP-MS and multicollector ICP-MS.

Reference (44)

## Supplementary materials

**Table S1. Strontium isotopic composition and concentration of surface water and reference samples.** For each water sample, we show sample locality, sample number, sampling date, geographic coordinates (decimal Grade System),  $^{87}\text{Sr}/^{86}\text{Sr}$  ratio, strontium concentration, 1/Sr conc. and distance from pristine water body to farmland. External reproducibility is determined from repeated analyses of Holocene Okinawa foraminiferal standards.

| Locality                                                                | Sample no. | Date of collection | Latitude  | Longitude | $^{87}\text{Sr}/^{86}\text{Sr}$ | Sr (mg/L) | 1/Sr   | Distance to farming (m) | Code* |
|-------------------------------------------------------------------------|------------|--------------------|-----------|-----------|---------------------------------|-----------|--------|-------------------------|-------|
| <b>1. Kompedal Plantage-Vallerbæk Stream-Karup River, (Fig. 3, S1A)</b> |            |                    |           |           |                                 |           |        |                         |       |
| Vallerbæk Stream                                                        | K-5        | 18-10-2017         | 56.241283 | 9.283874  | 0.71350                         | 0.006     | 154.42 | 1200                    | WP    |
| -                                                                       | K-3        | 31-08-2017         | 56.261781 | 9.252835  | 0.71317                         | 0.007     | 134.82 | 420                     | WP    |
| -                                                                       | K-1        | 31-08-2017         | 56.264756 | 9.244798  | 0.71307                         | 0.010     | 95.36  | 490                     | WP    |
| -                                                                       | K-2        | 31-08-2017         | 56.267736 | 9.237932  | 0.71268                         | 0.010     | 100.80 | 370                     | WP    |
| -                                                                       | K-14       | 08-06-2018         | 56.269419 | 9.231289  | 0.71305                         | 0.025     | 39.80  | 18§                     | WP    |
| -                                                                       | K-13       | 08-06-2018         | 56.269858 | 9.229301  | 0.71245                         | 0.036     | 28.00  | 5§                      | WP    |
| -                                                                       | K-6        | 22-11-2017         | 56.270895 | 9.224567  | 0.71099                         | 0.048     | 20.95  |                         | WF    |
| -                                                                       | K-6a       | 08-06-2018         | 56.270895 | 9.224567  | 0.71153                         | 0.038     | 26.60  |                         | WF    |
| -                                                                       | K-4        | 31-08-2017         | 56.275278 | 9.207502  | 0.70993                         | 0.069     | 14.40  |                         | WP    |
| Karup River                                                             | KAS        | 09-11-2017         | 56.290014 | 9.182303  | 0.70968                         | 0.084     | 11.97  |                         | WF    |
| -                                                                       | KAM        | 09-11-2017         | 56.303477 | 9.159860  | 0.70970                         | 0.090     | 11.15  |                         | WF    |
| -                                                                       | KAN        | 09-11-2017         | 56.313539 | 9.142920  | 0.70973                         | 0.103     | 9.70   |                         | WF    |
| Karup R at Hagebro                                                      | KAHA       | 09-11-2017         | 56.406313 | 9.008283  | 0.70954                         | 0.110     | 9.06   |                         | WF    |
| Karup R at Hagebro                                                      | KAHA-2     | 13-02-2018         | 56.377812 | 9.074645  | 0.70961                         | 0.109     | 9.17   |                         | WF    |
| Karup R at Resen                                                        | KARE       | 13-02-2018         | 56.377812 | 9.074645  | 0.70970                         | 0.111     | 9.02   |                         | WF    |
| Karup R at Trevad                                                       | KATR       | 13-02-2018         | 56.461869 | 8.984471  | 0.70946                         | 0.115     | 8.72   |                         | WF    |
| Karup R at Bærs                                                         | KABA       | 13-02-2018         | 56.514108 | 8.982449  | 0.70944                         | 0.119     | 8.44   |                         | WF    |
| Knudstrup (Pond)                                                        | K-7        | 29-10-2017         | 56.269251 | 9.312944  | 0.70804                         | 0.045     | 22.35  |                         | CF    |
| Groundwater†                                                            | KG-2       | 07-06-2018         | 56.231453 | 9.280806  | 0.71391                         | 0.048     | 20.90  | 1180                    | WP    |
| Groundwater‡                                                            | KG-3       | 07-06-2018         | 56.219763 | 9.248550  | 0.71308                         | 0.054     | 18.60  | 190                     | WP    |
| <b>2. Gludsted Plantage (Fig. S1C)</b>                                  |            |                    |           |           |                                 |           |        |                         |       |
| -                                                                       | G-2b       | 02-09-2017         | 56.087317 | 9.363807  | 0.71183                         | 0.003     | 342.13 | 680                     | WP    |
| -                                                                       | G-2a       | 02-09-2017         | 56.087075 | 9.363065  | 0.71183                         | 0.002     | 527.37 | 620                     | WP    |
| -                                                                       | G-4        | 01-09-2017         | 56.086048 | 9.354797  | 0.71277                         | 0.006     | 173.23 | 240                     | WP    |
| -                                                                       | G-1        | 01-09-2017         | 56.085255 | 9.349334  | 0.71147                         | 0.009     | 114.29 | 210                     | WP    |
| -                                                                       | G-5        | 19-09-2017         | 56.089903 | 9.324909  | 0.71039                         | 0.006     | 159.89 | 810                     | WP    |
| Storå river                                                             | G-3        | 02-09-2017         | 56.101352 | 9.274616  | 0.70905                         | 0.110     | 9.08   |                         | WF    |
| <b>3. Nørlund Plantage-Harrild Heath (Fig. S1D)</b>                     |            |                    |           |           |                                 |           |        |                         |       |
| Hallund Brook                                                           | NP-1       | 31-08-2017         | 56.053104 | 9.197114  | 0.71097                         | 0.011     | 93.04  | 1550                    | WP    |
| -                                                                       | NP-2       | 31-08-2017         | 56.052532 | 9.194030  | 0.71195                         | 0.006     | 176.77 | 1410                    | WP    |
| -                                                                       | NP-3       | 01-08-2017         | 56.050135 | 9.189121  | 0.71142                         | 0.037     | 27.13  | 440                     | WP    |
| -                                                                       | NP-4       | 31-08-2017         | 56.056118 | 9.139240  | 0.71011                         | 0.095     | 10.53  |                         | WF    |
| -                                                                       | NP-5       | 03-10-2017         | 56.059590 | 9.111094  | 0.70980                         | 0.065     | 15.34  |                         | WF    |
| Harrild Heath                                                           | HAR1       | 19-09-2017         | 56.014125 | 9.183813  | 0.71338                         | 0.005     | 197.40 | 880                     | WP    |
| <b>4. Frederikshåb Plantage (Fig. S1B)</b>                              |            |                    |           |           |                                 |           |        |                         |       |
| N. Voldborg Lake                                                        | FPNS-1     | 03-10-2017         | 55.687061 | 9.161826  | 0.71161                         | 0.023     | 43.47  | 550                     | WP    |
| -                                                                       | FPNS-2     | 03-10-2017         | 55.687061 | 9.161826  | 0.71229                         | 0.025     | 40.20  | 550                     | WP    |
| -                                                                       | FPNS-3     | 03-10-2017         | 55.687061 | 9.161826  | 0.71219                         | 0.025     | 40.11  | 550                     | WP    |
| S. Voldborg Lake                                                        | FPVS-1     | 15-08-2017         | 55.685132 | 9.163733  | 0.71227                         | 0.015     | 64.93  | 820                     | WP    |
| -                                                                       | FPVS-2     | 07-12-2017         | 55.685132 | 9.163733  | 0.71218                         | 0.017     | 57.31  | 820                     | WP    |
| Seven Year Lakes                                                        | FPSS-1     | 15-08-2017         | 55.678481 | 9.176481  | 0.71362                         | 0.017     | 59.10  | 500                     | WP    |
| -                                                                       | FPSS-2     | 07-12-2017         | 55.678481 | 9.176481  | 0.71103                         | 0.038     | 26.28  | 500                     | WP    |
| Hestdalen                                                               | FPH-1      | 03-10-2017         | 55.674149 | 9.224173  | 0.71431                         | 0.009     | 113.37 | 710                     | WP    |
| -                                                                       | FPH-2      | 07-12-2017         | 55.673964 | 9.232968  | 0.71495                         | 0.020     | 51.25  | 575                     | WP    |
| -                                                                       | FHP-3      | 12-12-2017         | 55.674052 | 9.233284  | 0.71372                         | 0.022     | 44.76  | 525                     | WP    |
| <b>5. Randbøl Heath (Fig. S1B)</b>                                      |            |                    |           |           |                                 |           |        |                         |       |
| -                                                                       | RH-1       | 15-08-2017         | 55.664033 | 9.150261  | 0.71138                         | 0.005     | 190.48 | 160                     | WP    |
| -                                                                       | RH-2       | 01-09-2017         | 55.670165 | 9.167517  | 0.71079                         | 0.002     | 426.14 | 620                     | WP    |
| -                                                                       | RH-2a      | 07-12-2017         | 55.670165 | 9.167517  | 0.71078                         | 0.003     | 300.31 | 620                     | WP    |
| -                                                                       | RH-3       | 01-09-2017         | 55.670549 | 9.167251  | 0.71246                         | 0.004     | 257.07 | 630                     | WP    |
| -                                                                       | RH-4       | 03-10-2017         | 55.658232 | 9.164567  | 0.71240                         | 0.002     | 463.37 | 540                     | WP    |
| -                                                                       | RH-5       | 06-10-2017         | 55.663273 | 9.151096  | 0.71146                         | 0.005     | 214.99 | 250                     | WP    |

|                                                   |        |             |           |           |         |         |        |      |    |
|---------------------------------------------------|--------|-------------|-----------|-----------|---------|---------|--------|------|----|
| -                                                 | RH-6   | 11-02-2018  | 55.655292 | 9.134861  | 0.71278 | 0.009   | 108.02 | 530  | WP |
| Sluggård Plantage                                 | SLA-1  | 11-02-2018  | 55.641518 | 9.118307  | 0.71210 | 0.004   | 229.93 | 480  | WP |
| <b>6. Hærvejen (Fig. S1B)</b>                     |        |             |           |           |         |         |        |      |    |
| -                                                 | HÆR-1  | 06-10-2017  | 55.645679 | 9.21044   | 0.71110 | 0.004   | 236.38 | 180  | CP |
| Raised Bog                                        | HÆR-2  | 09-01-2018  | 55.645222 | 9.213184  | 0.70952 | 0.016   | 61.17  | 320  | CP |
|                                                   | OEL-1  | 09-01-2018  | 55.634112 | 9.235347  | 0.71156 | 0.019   | 51.45  | 260  | CP |
| Natural spring                                    | OEL-3  | 09-01-2018  | 55.632508 | 9.233643  | 0.71191 | 0.064   | 15.74  | 170  | CP |
|                                                   | FIT-1  | 07-12-2017  | 55.620457 | 9.160824  | 0.70929 | 0.087   | 11.50  |      | WF |
| <b>7. Gyttegård Plantage (Fig. S1E)</b>           |        |             |           |           |         |         |        |      |    |
| -                                                 | GYT-2  | 07-12-2017  | 55.728742 | 9.028517  | 0.71484 | 0.016   | 62.97  | 350  | WP |
| <b>8. Bevtøft Plantage (Fig. S1J)</b>             |        |             |           |           |         |         |        |      |    |
| -                                                 | BEV-1  | 0-3-10-2017 | 55.205788 | 9.242873  | 0.71147 | 0.029   | 35.05  | 400  | WP |
| -                                                 | BEV-2  | 03-10-2017  | 55.203302 | 9.245468  | 0.71414 | 0.010   | 101.70 | 180  | WP |
| -                                                 | BEV-2a | 12-12-2017  | 55.203302 | 9.245468  | 0.71414 | 0.010   | 97.79  | 180  | WP |
| -                                                 | BEV-3  | 03-10-2017  | 55.210800 | 9.261471  | 0.70977 | 0.133   | 7.54   |      | WF |
| <b>9. Ruggård Plantage (Fig. S1G)</b>             |        |             |           |           |         |         |        |      |    |
| -                                                 | RUG-1  | 12-12-2017  | 55.114907 | 9.317624  | 0.71115 | 0.006   | 179.55 | 350  | WP |
| <b>10. Sepstrup Sande-Salten River (Fig. S1F)</b> |        |             |           |           |         |         |        |      |    |
| -                                                 | SEPS-2 | 29-10-2017  | 56.087291 | 9.400274  | 0.71356 | 0.005   | 186.81 | 590  | CP |
| -                                                 | SEPS 1 | 19-09-2017  | 56.082517 | 9.422146  | 0.71239 | 0.028   | 35.11  | 1030 | CP |
| Salten River                                      | SEPS-3 | 29-10-2017  | 56.056101 | 9.458571  | 0.70918 | 0.089   | 11.18  |      | CF |
| <b>11. Addit</b>                                  |        |             |           |           |         |         |        |      |    |
| -                                                 | ADD-1  | 01-01-2018  | 56.059889 | 9.644173  | 0.71075 | 0.001   | 694.57 | 620  | CP |
| Natural spring                                    | ADD-3  | 01-01-2018  | 56.056287 | 9.617739  | 0.71011 | 0.051   | 19.63  | 310  | CP |
| <b>12. Vejle Å (Fig. S1B)</b>                     |        |             |           |           |         |         |        |      |    |
| Rosdam spring                                     | RD-1   | 06-10-2017  | 55.658691 | 9.248123  | 0.70930 | 0.084   | 11.94  | 450  | CP |
| Vejle River                                       | VE-1   | 07-12-2017  | 55.650397 | 9.307452  | 0.70896 | 0.146   | 6.83   |      | CF |
| <b>13. Egtved (Fig. S1H)</b>                      |        |             |           |           |         |         |        |      |    |
| Fuglsang Forest                                   | EGS-1  | 09-01-2018  | 55.596524 | 9.310741  | 0.71139 | 0.009   | 105.71 | 300  | CP |
| Egtved Forest                                     | EGS-2a | 11-02-2018  | 55.596003 | 9.291486  | 0.71175 | 0.023   | 42.85  | 210  | CP |
| Bølling Stream                                    | BOE-1  | 11-02-2018  | 55.585392 | 9.344317  | 0.70945 | 0.133   | 7.51   |      | CF |
| <b>14. Mejsling Forest (Fig. S1)</b>              |        |             |           |           |         |         |        |      |    |
| -                                                 | MEJ-1  | 11-02-2018  | 55.634461 | 9.454002  | 0.71300 | 0.019   | 51.65  | 250  | CP |
| <b>15. Othillias Spring, Fillerup</b>             |        |             |           |           |         |         |        |      |    |
| -                                                 | OTH-1  | 10-11-2017  | 55.963641 | 10.119033 | 0.70936 | 0.232   | 4.31   |      | EF |
| <b>16. Vejle Fjord Fig. S1K)</b>                  |        |             |           |           |         |         |        |      |    |
| Lerbæk stream                                     | LER-1  | 08-10-2017  | 55.678270 | 9.806090  | 0.70917 | 0.303   | 3.31   | 380  | EP |
| Rosenvold River                                   | ROS-1  | 08-10-2017  | 55.678064 | 9.808310  | 0.70908 | 0.400   | 2.50   |      | EF |
| <b>17. Trelde Næs (Fig. S1L)</b>                  |        |             |           |           |         |         |        |      |    |
| -                                                 | TN-1   | 16-10-2017  | 55.620047 | 9.836078  | 0.70847 | 0.323   | 3.10   | 400  | EP |
| -                                                 | TN-2   | 16-10-2017  | 55.608214 | 9.823985  | 0.70897 | 0.270   | 3.70   | 850  | EP |
| -                                                 | TN-3   | 16-10-2017  | 55.610126 | 9.825847  | 0.70869 | 0.316   | 3.16   | 500  | EP |
| <b>18. Stenderup (Fig. S1M)</b>                   |        |             |           |           |         |         |        |      |    |
| Stenderup Nørre Forest                            | SN-1   | 16-10-2017  | 55.489128 | 9.6444371 | 0.70944 | 0.196   | 5.10   | 400  | EP |
| -                                                 | SN-2   | 16-10-2017  | 55.484884 | 9.649937  | 0.70949 | 0.232   | 4.31   | 850  | EP |
| Solkær River                                      | SOL-1  | 16-10-2017  | 55.459499 | 9.607834  | 0.70959 | 0.230   | 4.34   |      | EF |
| <b>19. Pamhule Forest (Fig. S1I)</b>              |        |             |           |           |         |         |        |      |    |
| Sophies Spring                                    | PS-1   | 03-10-2017  | 55.229121 | 9.436083  | 0.70886 | 0.338   | 2.96   | 500  | EP |
| Usholt Brook                                      | PS-2   | 03-10-2017  | 55.229984 | 9.437467  | 0.70953 | 0.168   | 5.94   |      | EF |
| Pond                                              | PS-3   | 12-12-2017  | 55.229067 | 9.387822  | 0.70949 | 0.163   | 6.13   | 360  | EP |
| Pond                                              | PS-4   | 12-12-2017  | 55.217326 | 9.402244  | 0.71016 | 0.062   | 16.07  | 425  | EP |
| <b>20. Hytterkobbel</b>                           |        |             |           |           |         |         |        |      |    |
| Hytterkobbel Forest                               | HYT-1  | 12-12-2017  | 55.161993 | 9.406865  | 0.71042 | 0.057   | 17.52  | 390  | EP |
| <b>Reference samples</b>                          |        |             |           |           |         |         |        |      |    |
| Rainwater, Odder                                  |        | 10-04-2017  | 55.972679 | 10.145713 | 0.708   | 0.00008 | 12177  |      |    |
| Holocene Foraminifera., Okinawa                   |        | 17-10-2017  |           |           | 0.70918 |         |        |      |    |
| Holocene Foraminifera., Okinawa                   |        | 16-01-2018  |           |           | 0.70918 |         |        |      |    |
| Holocene Foraminifera., Okinawa                   |        | 16-01-2018  |           |           | 0.70918 |         |        |      |    |
| Holocene Foraminifera., Okinawa                   |        | 28-09-2017  |           |           | 0.70917 |         |        |      |    |
| Holocene Foraminifera., Okinawa                   |        | 28-02-2018  |           |           | 0.70918 |         |        |      |    |
| Holocene Foraminifera., Okinawa                   |        | 14-06-2018  |           |           | 0.70918 |         |        |      |    |

\*Code: W, Zone West Jutland; C, Zone Central Jutland; E, Zone East Jutland P, pristine sample; F, farmland sample

†76.1007, ‡76.240, number in National well-database GEUS-Jupiter database.

§Two samples were collected to illustrate the transition from pristine areas to farmland.

**Table S2. Basic statistical data on strontium isotopic composition ( $^{87}\text{Sr}/^{86}\text{Sr}$ ) and strontium concentration of pristine and farmland samples from West, Central and East Jutland.**

| Strontium isotopic composition |              |          |                 |          |              |          |
|--------------------------------|--------------|----------|-----------------|----------|--------------|----------|
|                                | West Jutland |          | Central Jutland |          | East Jutland |          |
|                                | Pristine     | Farmland | Pristine        | Farmland | Pristine     | Farmland |
| Number                         | 37           | 15       | 12              | 4        | 10           | 4        |
| Minimum                        | 0.70905      | 0.70905  | 0.70930         | 0.70804  | 0.70847      | 0.70908  |
| Maximum                        | 0.71495      | 0.71099  | 0.71356         | 0.70945  | 0.71042      | 0.70959  |
| Mean                           | 0.71231      | 0.70972  | 0.71136         | 0.70890  | 0.70931      | 0.70939  |
| Stand. Dev.                    | 0.00130      | 0.00043  | 0.00130         | 0.00061  | 0.00062      | 0.00022  |

  

| Strontium concentration |              |          |                 |          |              |          |
|-------------------------|--------------|----------|-----------------|----------|--------------|----------|
|                         | West Jutland |          | Central Jutland |          | East Jutland |          |
|                         | Pristine     | Farmland | Pristine        | Farmland | Pristine     | Farmland |
| Number                  | 37           | 15       | 12              | 4        | 10           | 4        |
| Minimum                 | 0.002        | 0.048    | 0.001           | 0.045    | 0.057        | 0.168    |
| Maximum                 | 0.110        | 0.133    | 0.084           | 0.146    | 0.338        | 0.400    |
| Mean                    | 0.015        | 0.096    | 0.027           | 0.103    | 0.226        | 0.258    |
| Stand. Dev.             | 0.019        | 0.023    | 0.026           | 0.046    | 0.104        | 0.010    |

**Table S3. Strontium composition of lime products, fertilizers and animal feed.**

| Product                            | $^{87}\text{Sr}/^{86}\text{Sr}$ | Sr conc. (ppm) |
|------------------------------------|---------------------------------|----------------|
| <b>Lime and lime products</b>      |                                 |                |
| Chalk, Dania (U. Maastrichtian)    | 0.70784                         | 797            |
| Chalk Gudumholm (U. Maastrichtian) | 0.70786                         | 1055           |
| Mag. Limestone, England (Permian)  | 0.70753                         | 58             |
| 2.5 % Mg-Chalk, Dankalk, Aggersund | 0.70785                         | 599            |
| <b>Fertilizers (chemical)</b>      |                                 |                |
| NS 27-4                            | 0.70741                         | 214            |
| NP 20-9                            | 0.70344                         | 38.4           |
| Kali 49                            | 0.71475                         | 7.3            |
| <b>Fertilizer (organic) (AKK)</b>  |                                 |                |
| Protamylasse (potato-based)        | 0.70773                         | 0.1            |
| <b>Local plant production</b>      |                                 |                |
| Maize                              | 0.70821                         | 11.3           |
| Rolled Barley                      | 0.70769                         | 4.8            |
| Barley, whole                      | 0.70773                         | 22.3           |
| Concentrated feed (Import)         | 0.70973                         | 34.5           |
| <b>Imported animal feed</b>        |                                 |                |
| Soy meal Argentina A, (dlg)        | 0.70730                         | 18.6           |
| Soy meal Argentina B, (dlg)        | 0.70722                         | 21.8           |
| <b>Other soy products</b>          |                                 |                |
| Soy bean China A                   | 0.70994                         | 7.1            |
| Soy bean China B                   | 0.71012                         | 5.1            |
| Soy Austria A                      | 0.71227                         | 3.7            |
| Soy Austria B                      | 0.71230                         | 3.9            |

**Table S4. Calculated strontium isotope composition and concentration for two representative farms in the Vallerbæk area, and for the strontium composition of manure.**

| <b>Farm 1 - 80 hectares</b>  |            |                                 |              |                                 |               |               |
|------------------------------|------------|---------------------------------|--------------|---------------------------------|---------------|---------------|
| Component                    | kg/ha/year | Sr (ppm)                        | g Sr/ha/year | $^{87}\text{Sr}/^{86}\text{Sr}$ | % of total Sr |               |
| NS 27-4 (Fertilizer)         | 450        | 214                             | 96.3         | 0.70741                         | 10.7          |               |
| Kali 49 (Fertilizer)         | 90         | 7.3                             | 0.7          | 0.71475                         | 0.1           |               |
| Agricultural Lime            | 1000       | 800                             | 800          | 0.70785                         | 89.2          |               |
| <b>Total</b>                 |            |                                 | <b>897</b>   | <b>0.70781</b>                  |               |               |
| <b>Farm 2 - 100 hectares</b> |            |                                 |              |                                 |               |               |
| Component                    | kg/ha/year | Sr (ppm)                        | g Sr/ha/year | $^{87}\text{Sr}/^{86}\text{Sr}$ | % of total Sr |               |
| NP 20-9                      | 50         | 38.4                            | 1.9          | 0.70344                         | 0.3           |               |
| NS 27-4                      | 130        | 214                             | 27.8         | 0.70741                         | 3.7           |               |
| Kali 49                      | 66         | 7.3                             | 0.5          | 0.71475                         | 0.1           |               |
| Protamylasse (K fertilizer)  | 2000       | 0.1                             | 0.2          | 0.70773                         | 0.0           |               |
| Manure                       | 35000      | 2.2                             | 76.9         | 0.70829                         | 10.3          |               |
| Agricultural Lime            | 800        | 800                             | 640          | 0.70785                         | 85.6          |               |
| <b>Total</b>                 |            |                                 | <b>747</b>   | <b>0.70787</b>                  |               |               |
| <b>Manure</b>                |            | $^{87}\text{Sr}/^{86}\text{Sr}$ | Sr (ppm)     | kg/day/cow                      | g Sr/day/cow  | % of total Sr |
| Rolled Barley                |            | 0.70769                         | 4.8          | 11                              | 0.05          | 13.9          |
| Whole Cut Grass              |            | 0.70773                         | 22.3         | 11                              | 0.24          | 64.1          |
| Soy Pellets                  |            | 0.70973                         | 34.5         | 2                               | 0.07          | 18.0          |
| Water                        |            | 0.71300                         | 0.1          | 150                             | 0.02          | 3.9           |
| <b>Average Manure</b>        |            | <b>0.70829</b>                  | <b>2.20</b>  | <b>174</b>                      | <b>0.382</b>  |               |

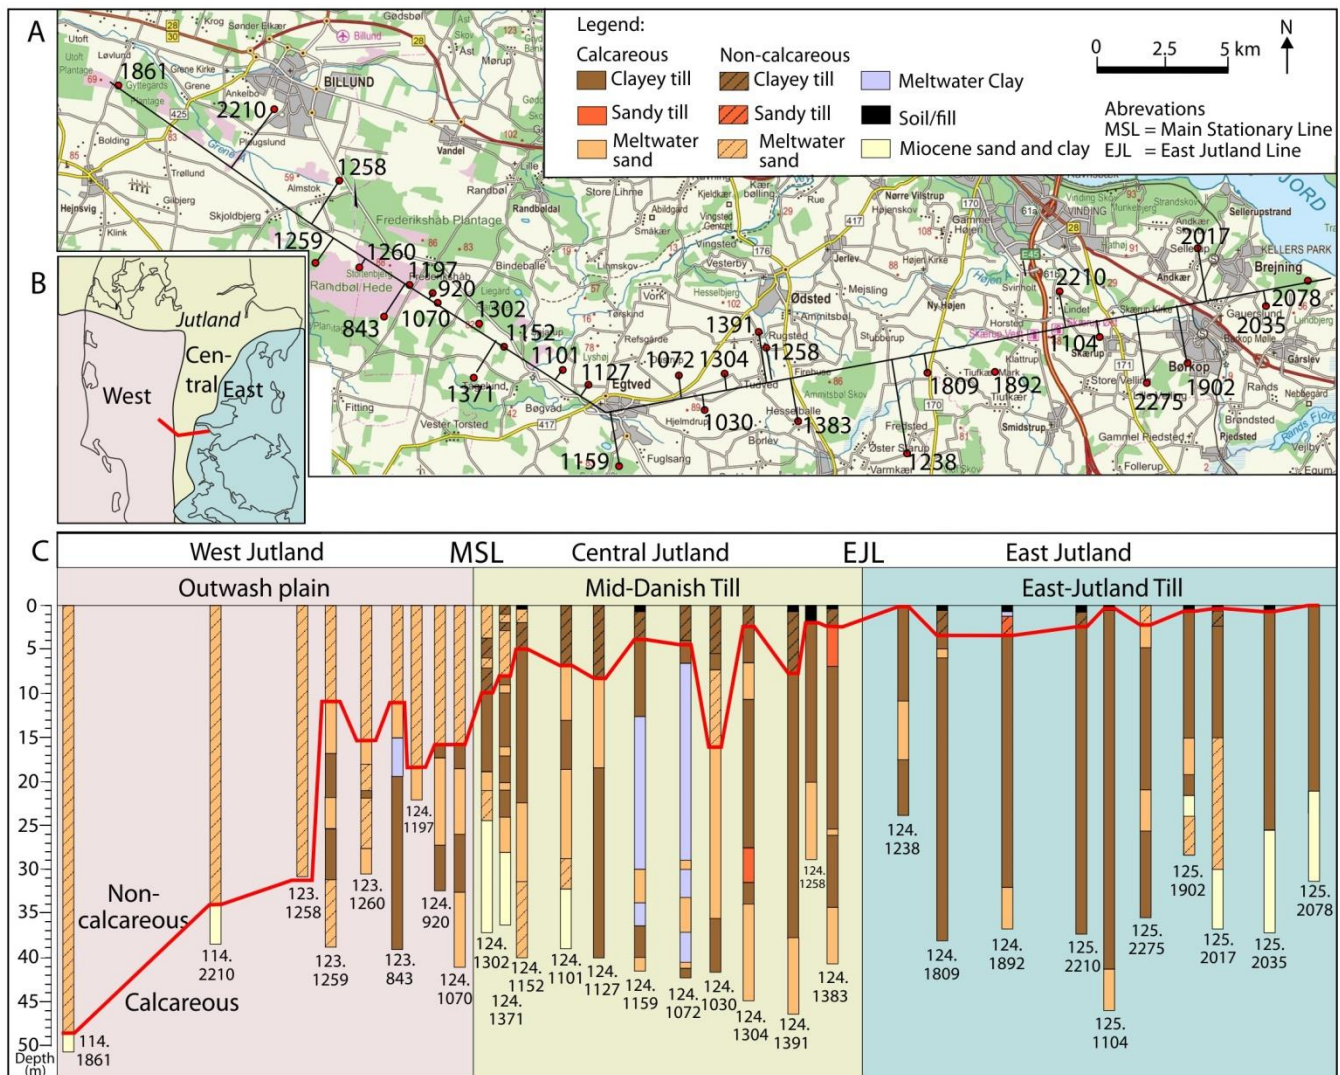

**Fig. S1. Calcium carbonate distribution in glaciogenic deposits in an east-west geological profile across middle Jutland from Bjerring to Billund.** (A) Map showing the location of examined wells. (B) Map showing the position of the geological cross section relative to the geological subdivision of the study area into West, Central and East Jutland (see main text Fig. 1). (C) Geological profile showing the thickness of the non-calcareous zone and the distribution of main lithological units. The cross section is based on data from the GEUS-Jupiter database of water wells and shallow borings in Denmark, maintained by the Geological Survey of Denmark and Greenland (GEUS). Maps in (A) and (B) are based on data from "Styrelsen for Dataforsyning og Effektivisering, skærkortet, WMS-tjeneste".

**fig. S1. Supplementary text.**

The glacial deposits of the study area are subdivided into three geological zones, termed West, Central and East (fig. S2). One of the most important differences between the three zones is the

content of calcium carbonate. Calcium carbonate in surface deposits is often dissolved due to leaching. However, the thickness of the leached zone varies. It is thickest in West and Central Jutland and thinnest in East Jutland (18), but the thickness of the non-calcareous zone is poorly known. The tills of East Jutland are clearly more calcareous than the deposits of West and Central Jutland. In 5\*5 km grid investigation, 3% and 5% of the samples from West and Central Jutland, respectively, contained calcium carbonate, compared to 50% of the samples from East Jutland (44).

To compliment these rough estimates, we have examined the thickness of the non-calcareous zone in an east-west profile south of the Vejle Tunnel Valley from the tills of East Jutland to outwash plain of West Jutland (fig. S2). The cross-section passes through the most densely sampled part of the study area. The results clearly confirm previous estimates. In West Jutland, the thickness of the non-calcareous zone increases from about 15 m closest to the Main Stationary Line to more than 50 m about 15 km west of the line. In Central Jutland, the thickness of the non/calcareous zone varies between 2.5 and 16 m with an average thickness around 7 m. In East Jutland, the thickness varies between zero and 2-3 m.

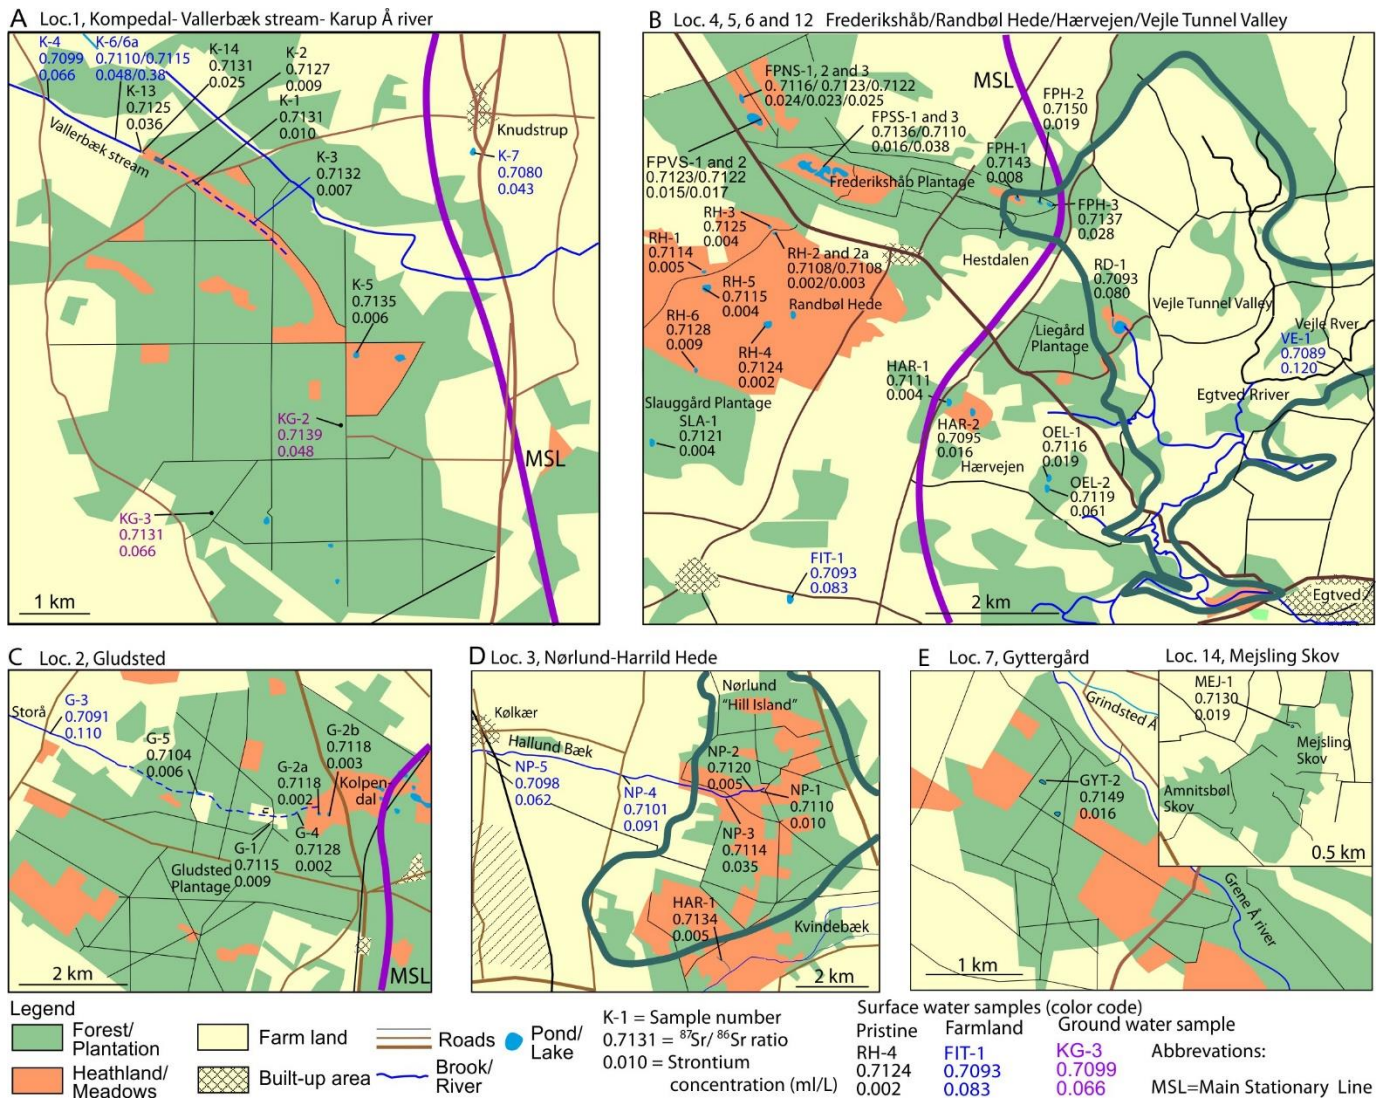

**Fig. S2, part 1. Simplified maps of localities showing sample position and strontium data.**

The geographic location of localities is indicated in Fig.1B. The geographic coordinates, sampling date, and strontium data are given in table S1. For each sample, the  $^{87}\text{Sr}/^{86}\text{Sr}$  ratio and the strontium concentration is indicated. Pristine samples are in black lettering; farmland samples are in blue lettering. Groundwater samples from pristine areas are in dark purple lettering (see fig. S1A). Maps are based on data from "Styrelsen for Dataforsyning og Effektivisering, skærkortet, WMS-tjeneste".



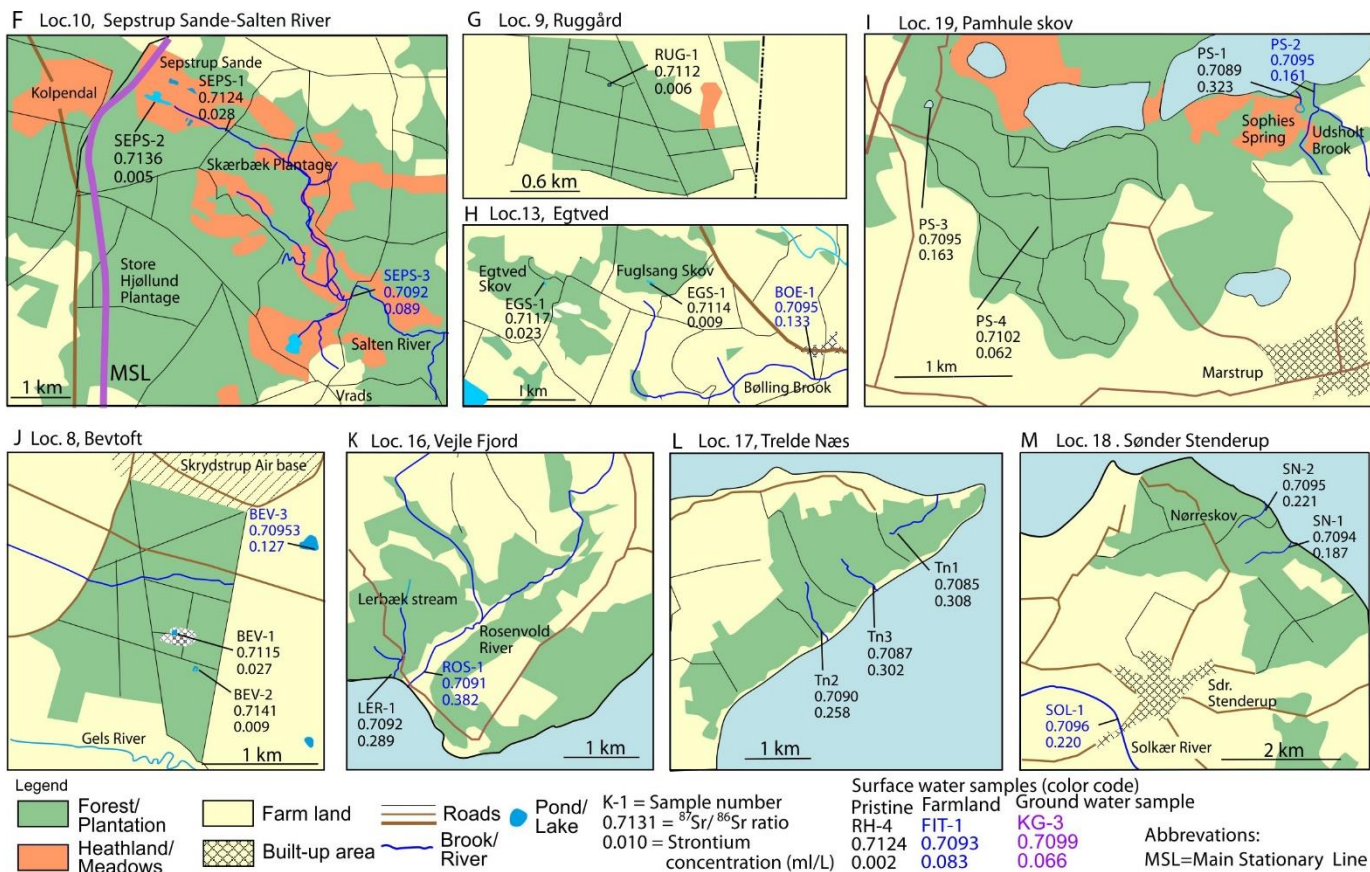

**Fig. S2, part 2. Simplified maps of localities showing sample position and strontium data.**

For explanation see text to fig. S2, part 1.

### Description of localities.

**Locality 1, Kompedal Plantage-Karup River** (fig. S1A). An overview of the locality is presented in main text Fig. 3. Here only the tributary Vallerbæk stream is shown. The locality is situated on the Karup Outwash Plain (Fig. 3). Vallerbæk stream flows in an approximately 150 m wide and up to 8 m deep erosional valley cut into the outwash plain during the deglaciation and Holocene. The uppermost 4 km of the stream runs within Kompedal Plantage and is classified as pristine. This part of the stream is tiny and often discontinuous at the surface. Sample K-7 was taken in a pond on farmland about 4 km NE of the forest and is hydrologically connected eastward to the Gudenå River system.

**Locality 2, Gludsted Plantage** (fig. S1C); **locality 10, Sepstrup Sande** (fig. S1F). Gludsted Plantage is located on the outwash plain in front of the tunnel valley at Sepstrup Sande (Loc. 10). The outwash plain and the tunnel valley are separated by the Main Stationary Line (MSL) (see main text). The streams on the outwash plain flow westward, while the streams at Sepstrup Sande flow eastward. The stream

running through Gludsted Plantage constitutes the beginning of Storå River. Within the forest, it is generally not continuous at the surface. Samples G-1 to G-5 were collected from pristine areas. Sample G-4 is from farmland 2 km east of the forest. Sample SADS-1 and 2 from the Sepstrup Sande tunnel valley are from pristine areas; SADS-3 is influenced by farming.

**Locality 3, Nørlund Plantage** (fig. S1D). Samples NP-1-NP-3 were collected on Nørlund “Hill Island” in the spring area of Hallund Brook, a tributary to the Skjern Å River. The upper part of the brook runs in a shallow meadow surrounded by coniferous forests. Samples NP-4 and NP-5 were collected from farmland on the outwash plain 1.7 km and 5 km, respectively, west of the forest. Sample HAR-1 is from Harrild Heath on the outwash plain south of Nørlund Hill Island. This pristine sample was collected from a side branch of Kvinde Brook.

**Locality 4, Frederikshåb Plantage; Locality 5, Randbøl Heath; Locality 6, Hærvejen** (fig. S1B). These localities are all located on the Grindsted outwash plain west of Vejle Tunnel Valley. The samples from Frederikshåb Plantage and Hestdalen were collected in a series of small lakes and ponds located in a shallow erosional valley cut into the outwash plain probably by meltwater from the tunnel valley. The lakes from Frederikshåb Plantage show highly variable water levels and they doubled in size during the fall of 2017. The samples from the very flat Randbøl Hede and Slauggard Plantage outwash plains were collected in ponds and small lakes of unknown origin. None of the samples from localities 4 and 5 are considered to have been affected by farming. The samples from Hærvejen have various origins including a natural spring and a raised bog (see table T1). Two samples (marked with red numbering in fig. S1B) are affected by farm land. The remaining samples are from pristine water.

**Locality 7, Gyttegård Plantage** (fig. S1E). The pristine sample was collected in an elongate pond completely surrounded by forest.

**Locality 8, Bevtøft Plantage** (fig. S1J). The locality is situated on the outwash plain separating Gram and the Toflund “Hill Islands” about 3 km east of the MSL and about 4 km southwest of the Bronze-age burial mound of the Skrydstrup Woman. Samples BEV-1 and BEV-2 were collected from two pristine ponds within the forest. However, the surroundings of BEV-1 are cleared for trees and are maintained with grass cutting machines and the pond may be contaminated. BEV-3 was sampled from an abandoned water-filled gravel pit located on farm land about 500 m east of the forest.

**Locality 9, Ruggård** (fig. S1G). The pristine sample was collected in a circular pond in the northern part of the forest.

**Locality 10**, see locality 2.

**Localities 12, Vejle Tunnel Valley** (Fig. S1B); **Locality 13, Egtved** (fig. S1H). Sample ROS-1 is from a natural spring situated at the end of the Vejle Tunnel Valley about 35 vertical meters below the outwash plain. It is classified as pristine. Sample VE-1 is from Vejle Å River and clearly affected by farming. The two samples from Fuglsang Forest and Egtved Forest are pristine, whereas the water sample from Bølling Brook is influenced by farming.

**Localities 16, Vejle Fjord** (fig. S1K); **Locality 17, Trelde Næs** (fig. S1L); **Locality 18. Sønder Stenderup** (fig. S1M) and **Locality 19, Pamhule Forest** (fig. S1I). **Locality 20, Hytterkobbøl**. These localities are all located in areas dominated by the calcareous, clayey East Jutland Till (Fig.1A,B). Samples were collected from brooks and streams except for the sample from Hytterkobbøl and the three pristine samples from Pamhule Forest (PS-1, PS-2 and PS-3), which were taken from small ponds and a spring.

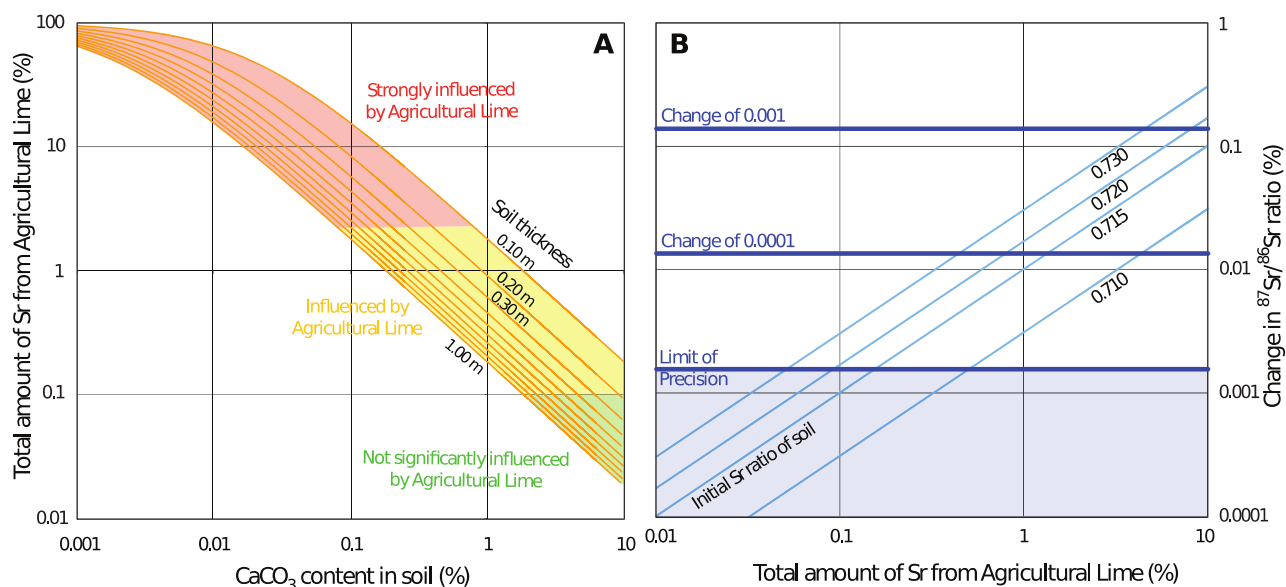

**Fig. S3. Influence of soil thickness and soil composition on the level of disturbance of the  $^{87}\text{Sr}/^{86}\text{Sr}$  ratio from agricultural Lime.** (A). The change in  $^{87}\text{Sr}/^{86}\text{Sr}$  ratio as a function of how much of total strontium in a surface water sample is coming from agricultural lime (B). These calculations should be used as rough guidelines only as the Sr concentration in natural and agricultural lime and soil may vary, as may the Sr isotopic composition of agricultural lime used in different places.

**fig. S3. Supplementary text.**

How strongly the strontium isotopic composition of surface water is influenced by the use of agricultural lime is dependent on how much strontium there is in the soil, the isotopic composition of the soil and the thickness of the soil that the agricultural lime and rainwater effectively interact with. In fig. S3A, a simple estimate of the amount of the total Sr is coming from agricultural lime is given, based on how much calcium carbonate (or equivalent of other easily leachable source of Sr) is naturally in the soil, the thickness of the soil column the agricultural water is percolating through, and an average liming rate. For soils with less than 1%  $\text{CaCO}_3$ , the total amount of Sr coming from agricultural lime is around 1% or more. In fig. S3B a calculation of how much the Sr isotopic ratio shifts as function of the amount of agricultural lime and the natural Sr isotopic ratio is presented. The further the natural Sr isotopic ratio is from that of the agricultural lime (in this example a mid-Cretaceous limestone with  $^{87}\text{Sr}/^{86}\text{Sr} = 0.7078$  is used), the more it will be influenced by the agricultural lime. At a level of 1% Sr from agricultural lime the resulting shift in Sr isotopic composition is resolvable for all lithologies not dominated by carbonates and for areas with crustal signatures with high  $^{87}\text{Sr}/^{86}\text{Sr}$  ratios very small amounts of agricultural lime will severely alter the strontium isotopic composition of surface water.

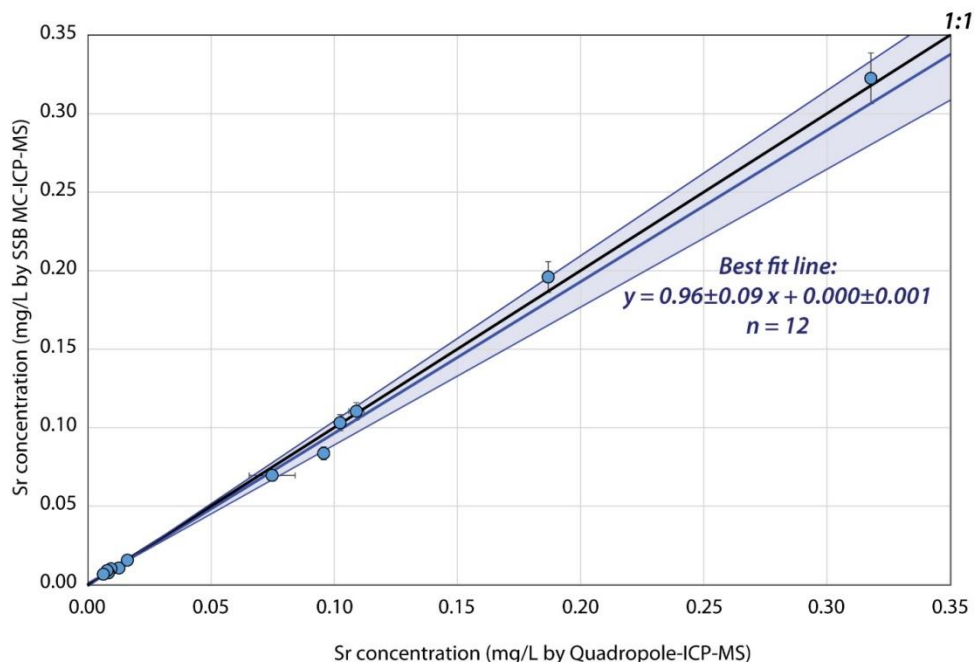

**Fig. S4. Comparison of strontium concentrations measured by quadrupole ICP-MS and multi-collector ICP-MS.** Twelve samples were analyzed for their strontium concentration by both quadrupole ICP-MS (Agilent 7900) and standard-sample-bracketing multi-collector ICP-MS (Nu Plasma II). The results from the two methods are in good agreement, and suggests that the standard-sample-bracketing multi-collector give accurate results. An uncertainty of 5% is assigned to the Sr concentration data of the entire sample set measured by standard-sample-bracketing multi-collector ICP-MS, based on the reproducibility of standards.
